# Supplementary material for: A molnupiravir-associated mutational signature in global SARS-CoV-2 genomes
Source: bioRxiv or medRxiv preprint supplement (doi:10.1101/2023.01.26.23284998), 2023-08-18

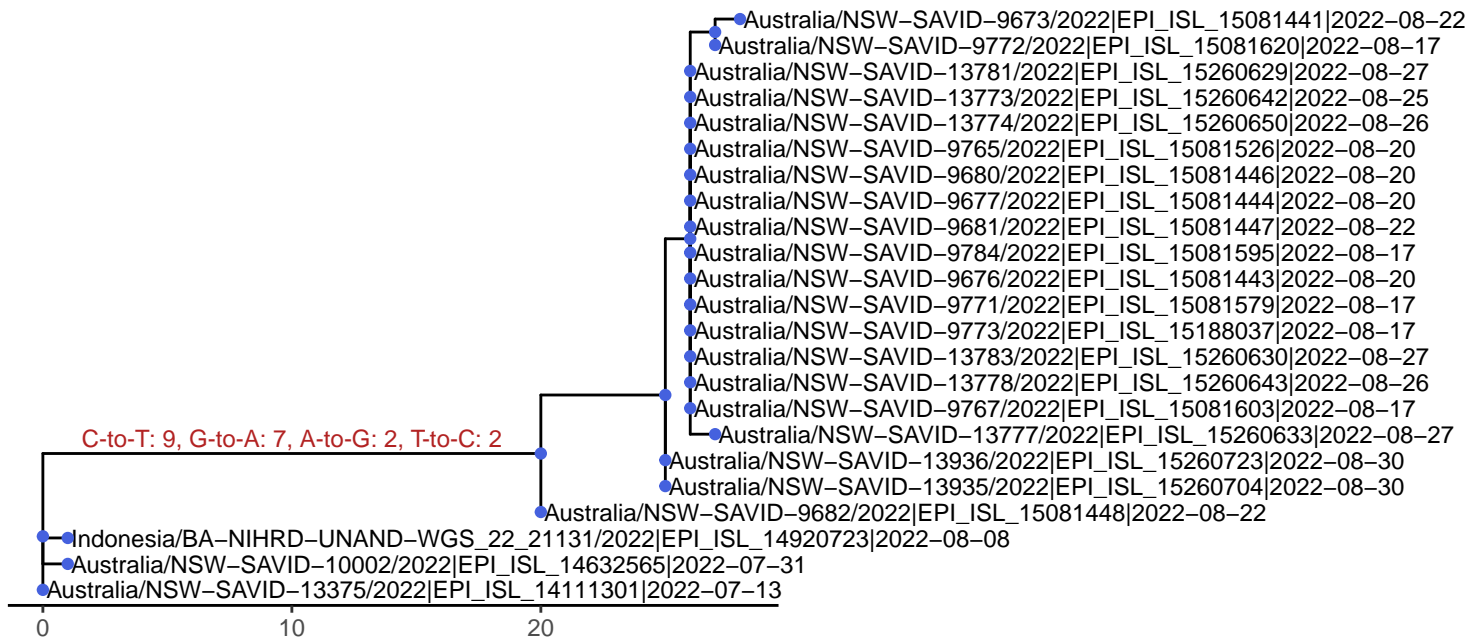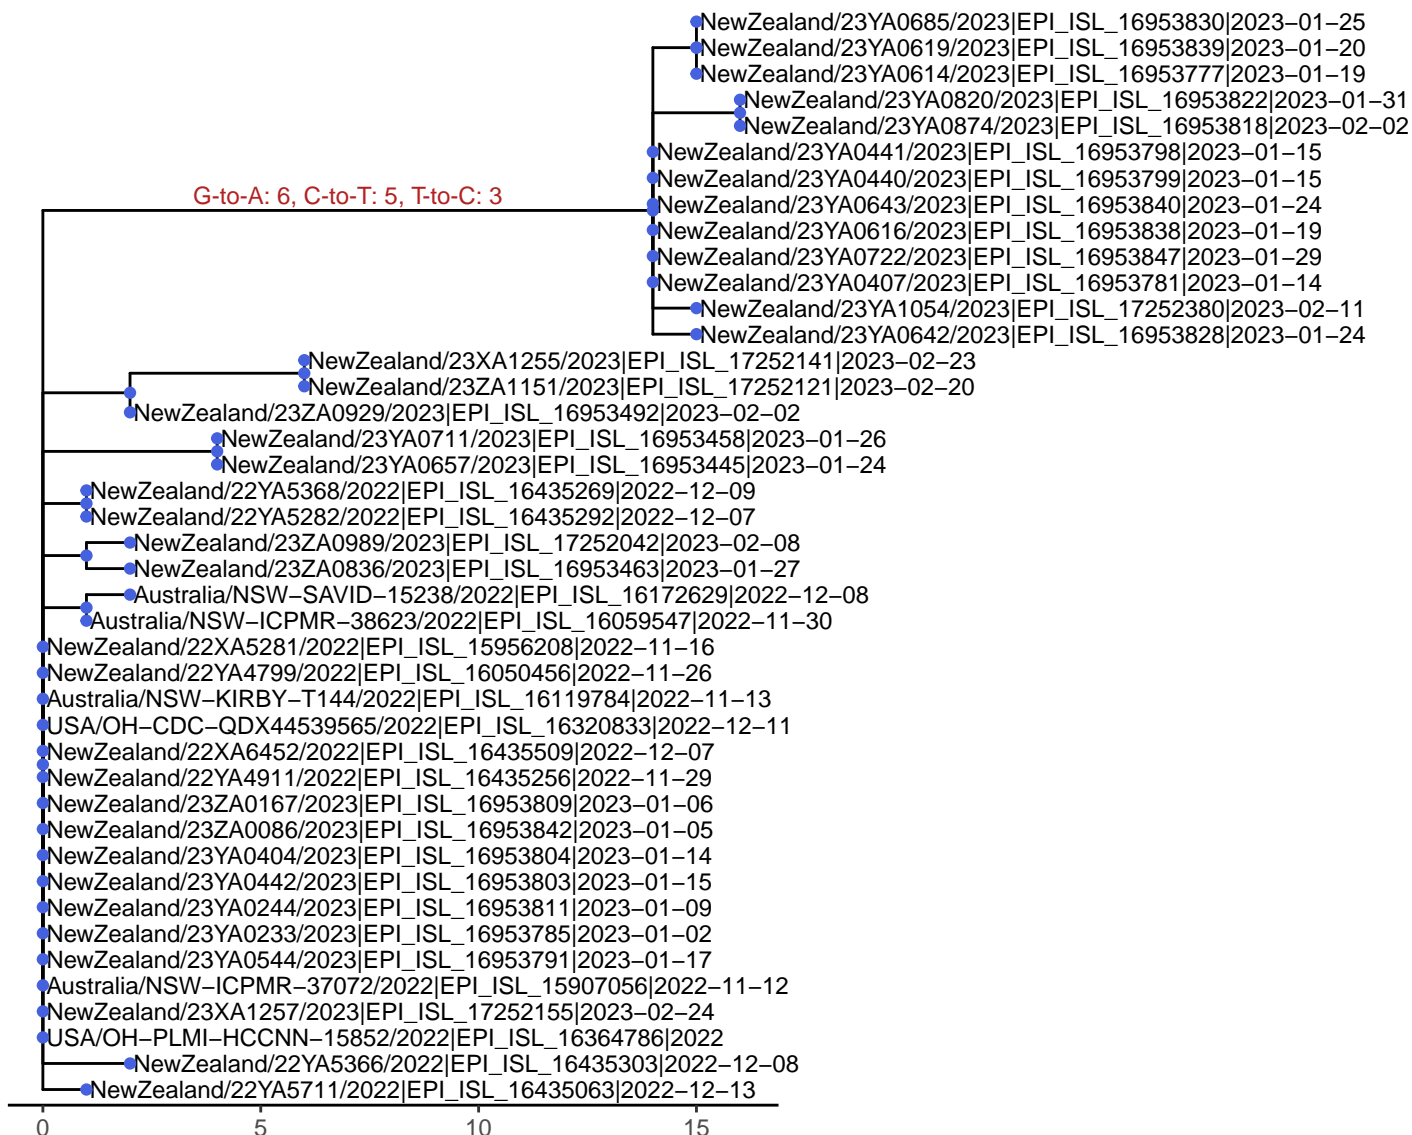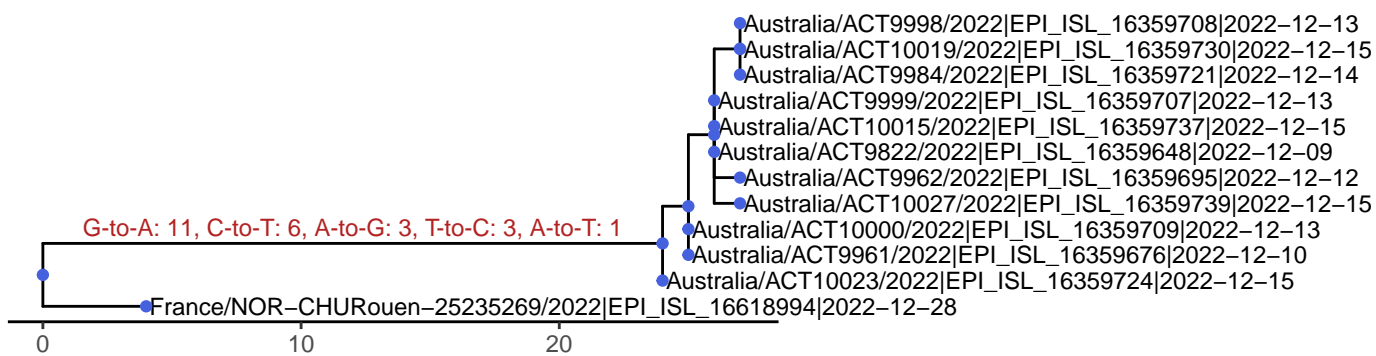

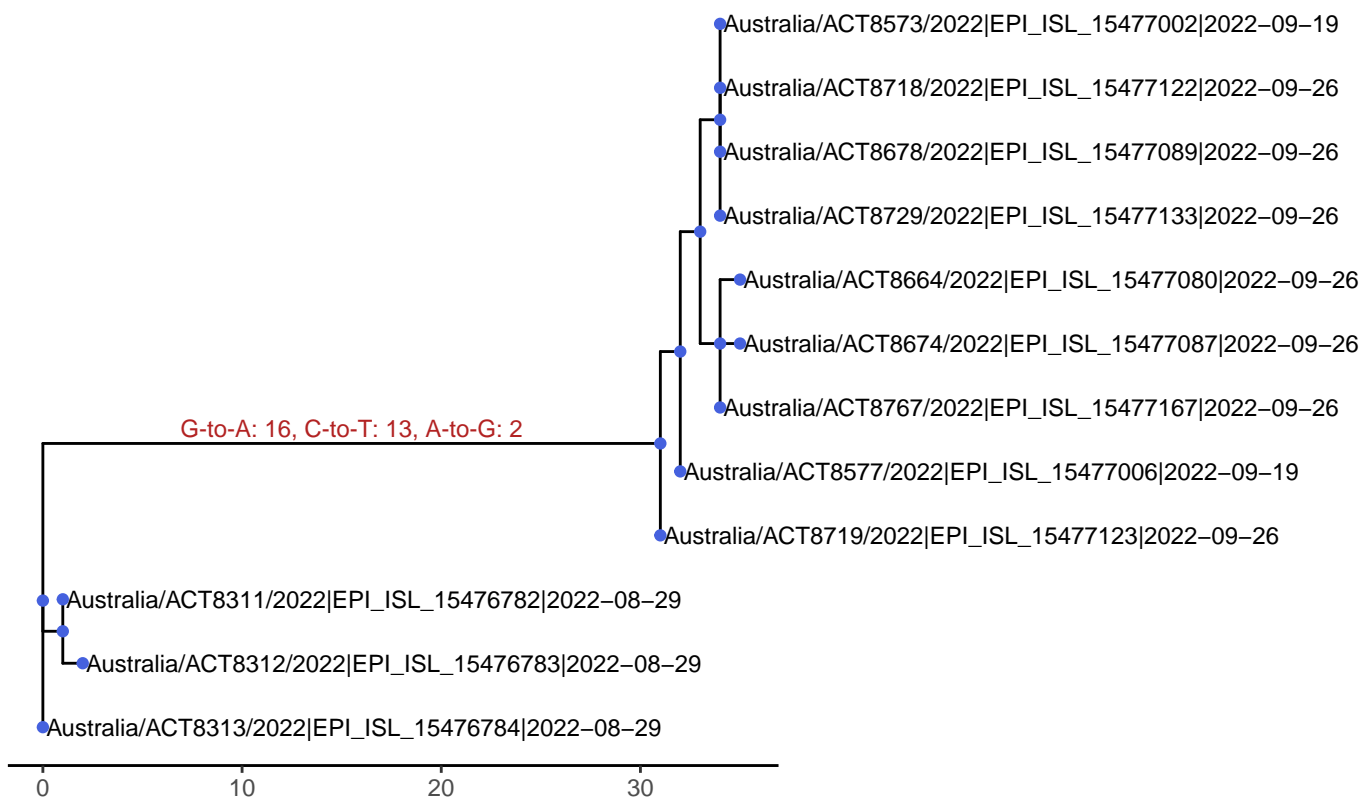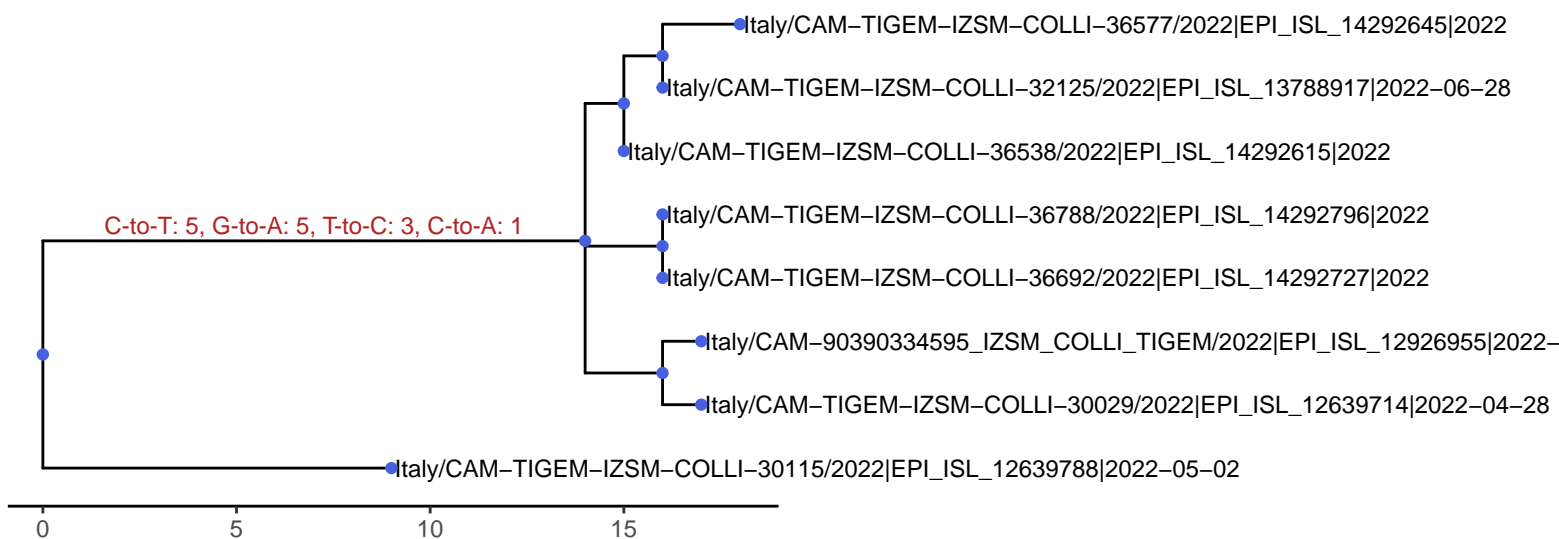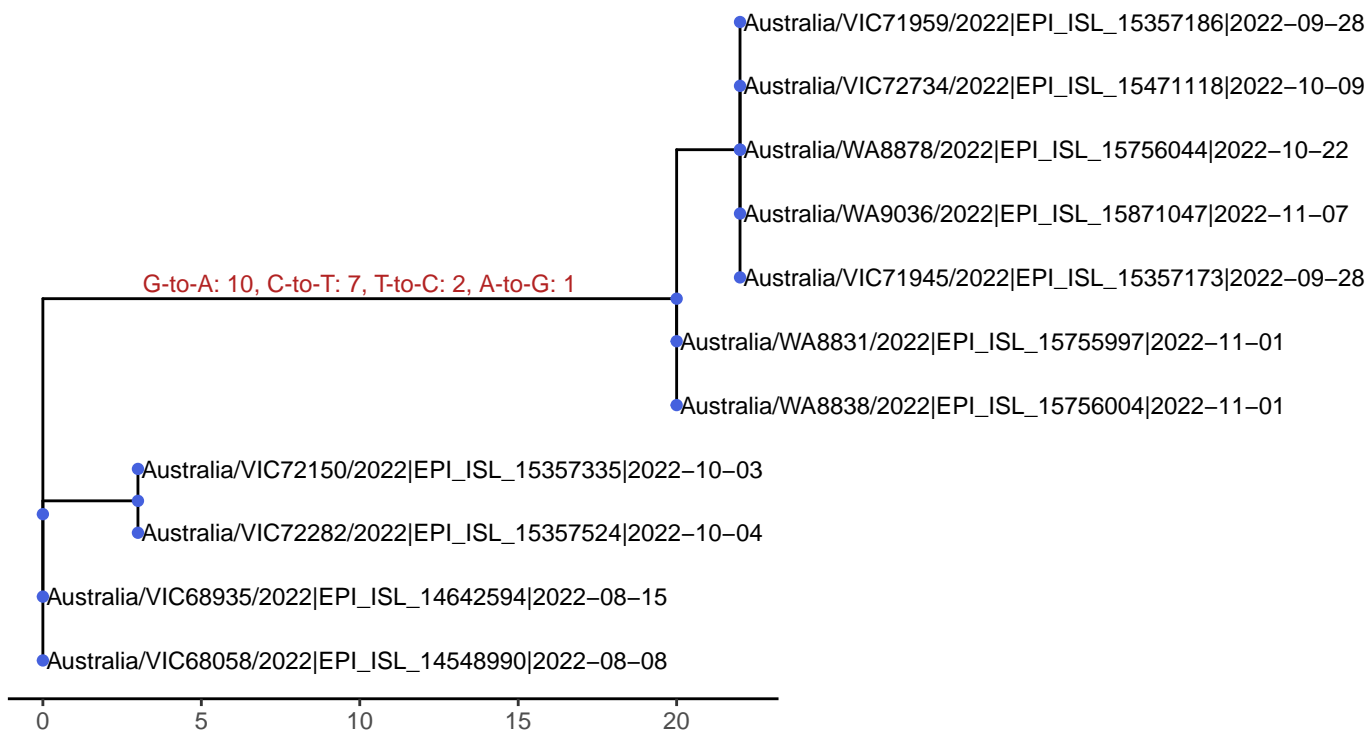

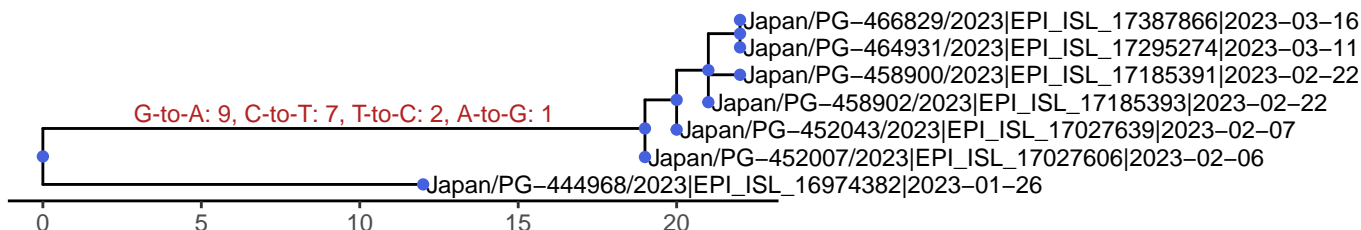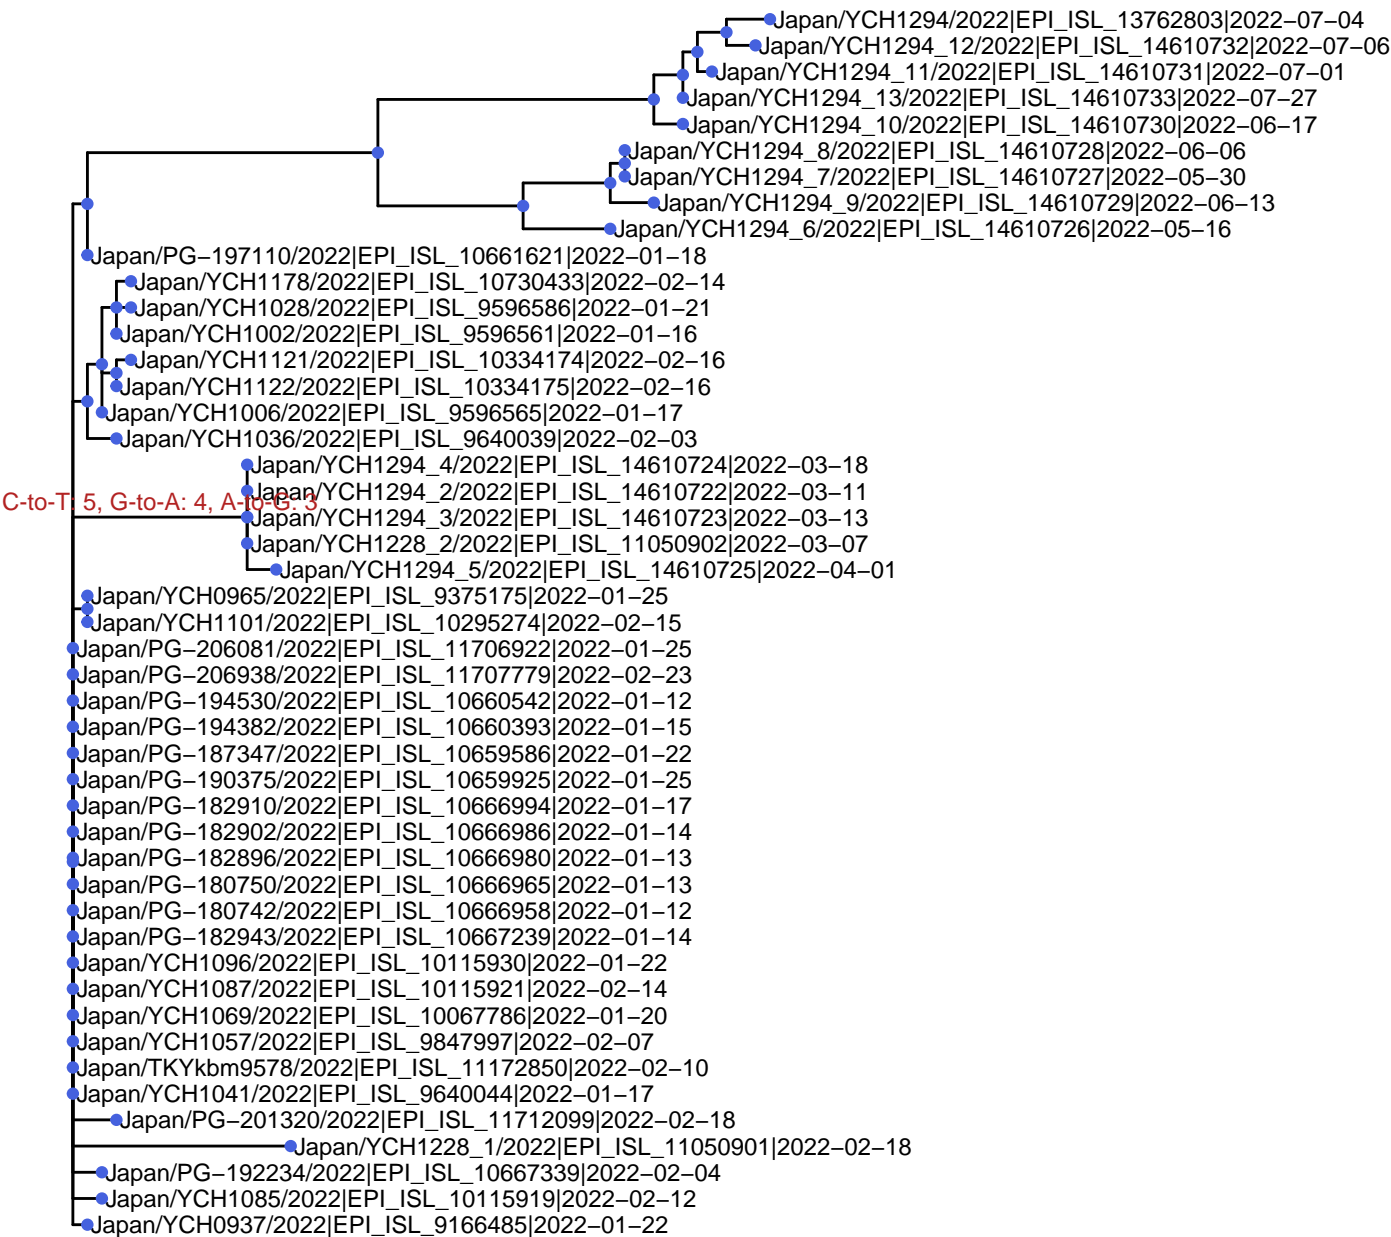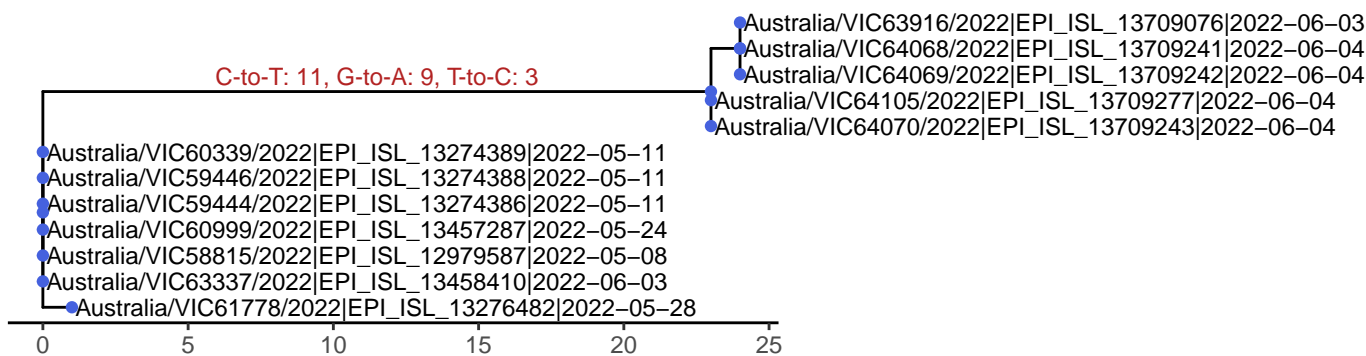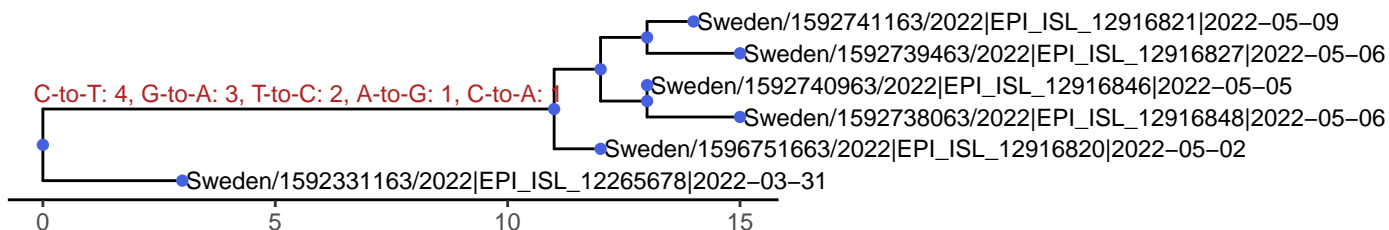

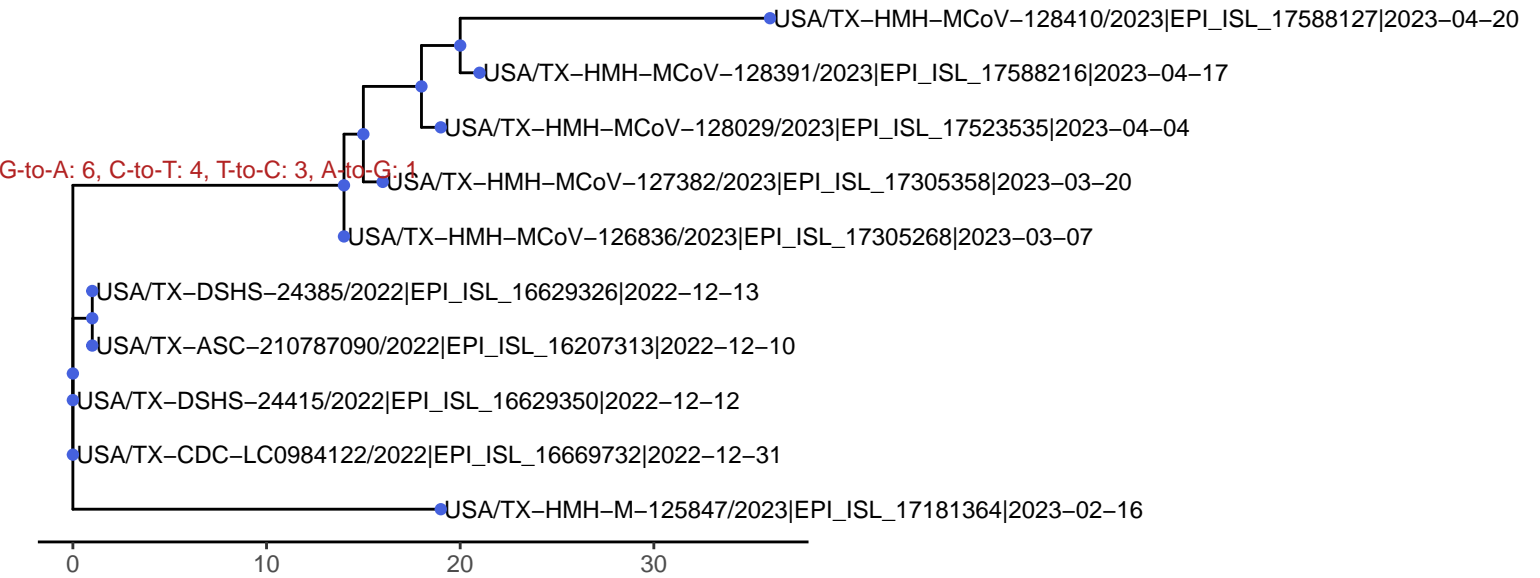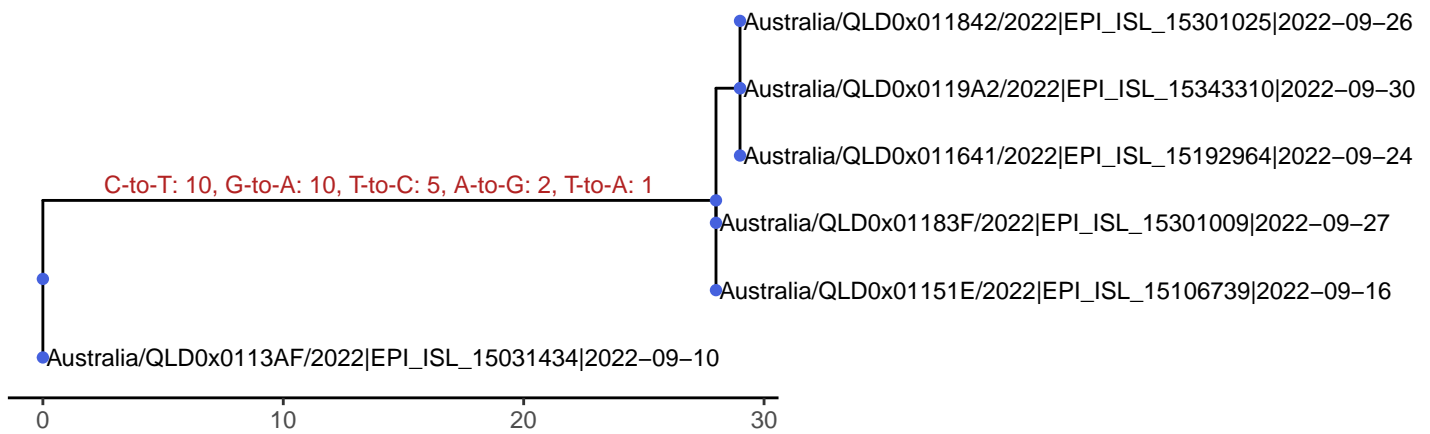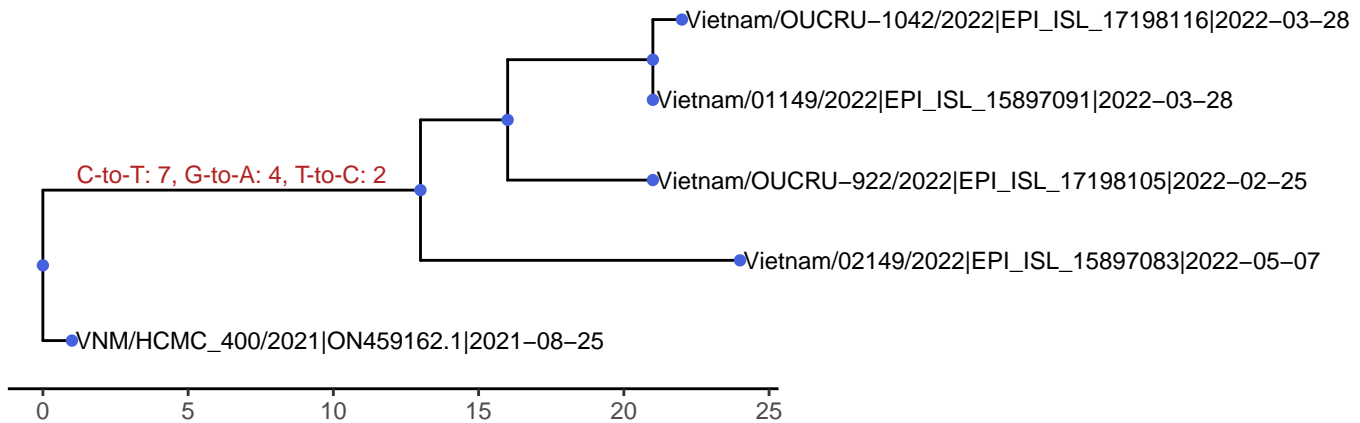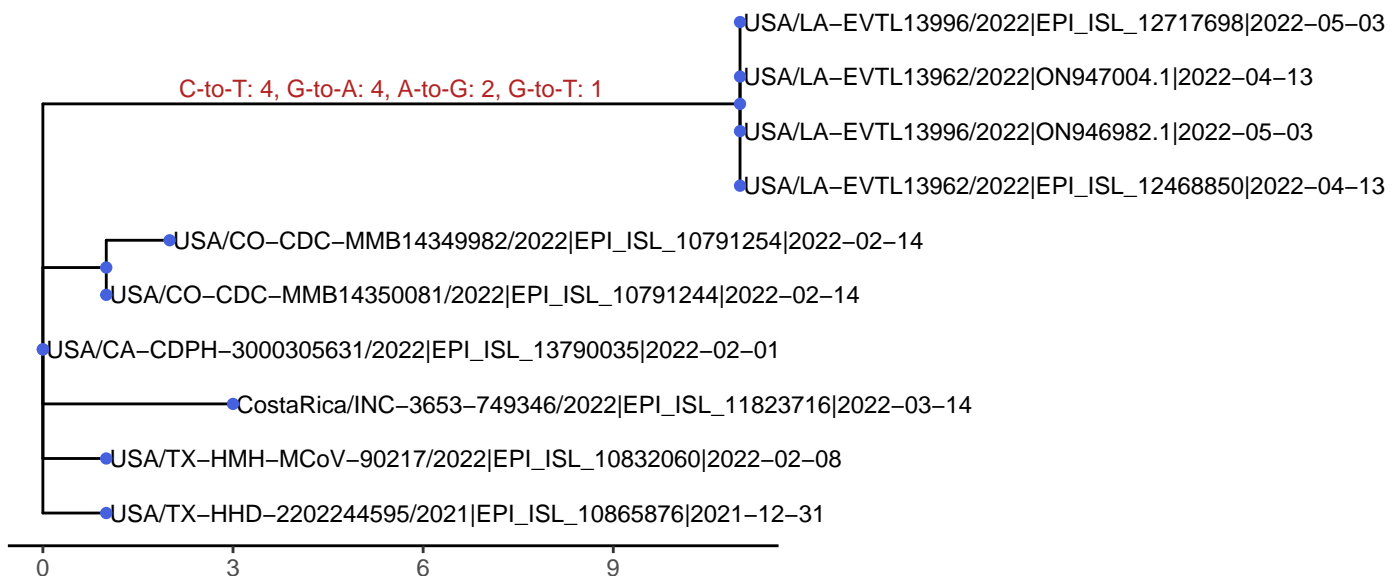

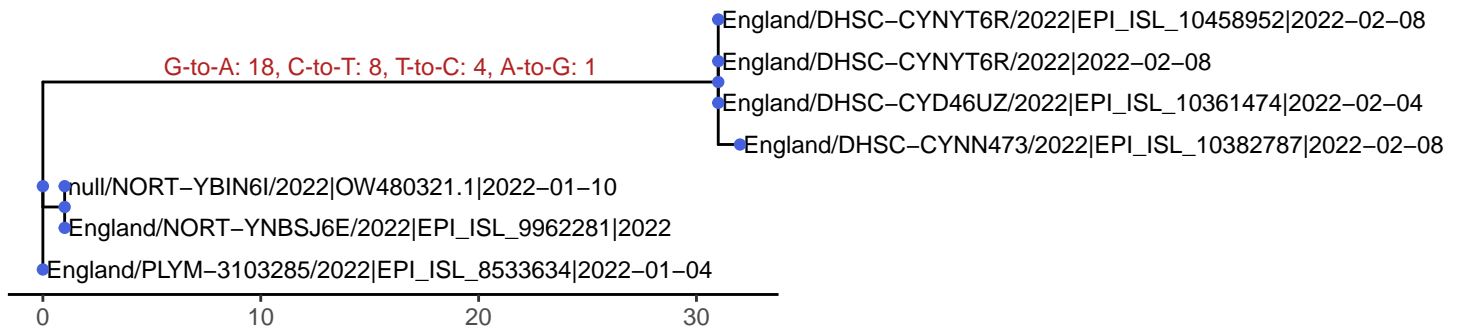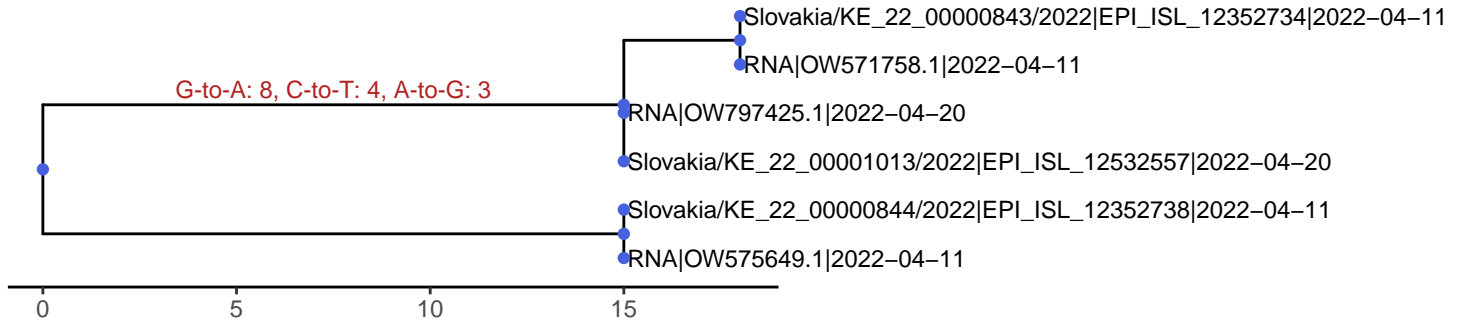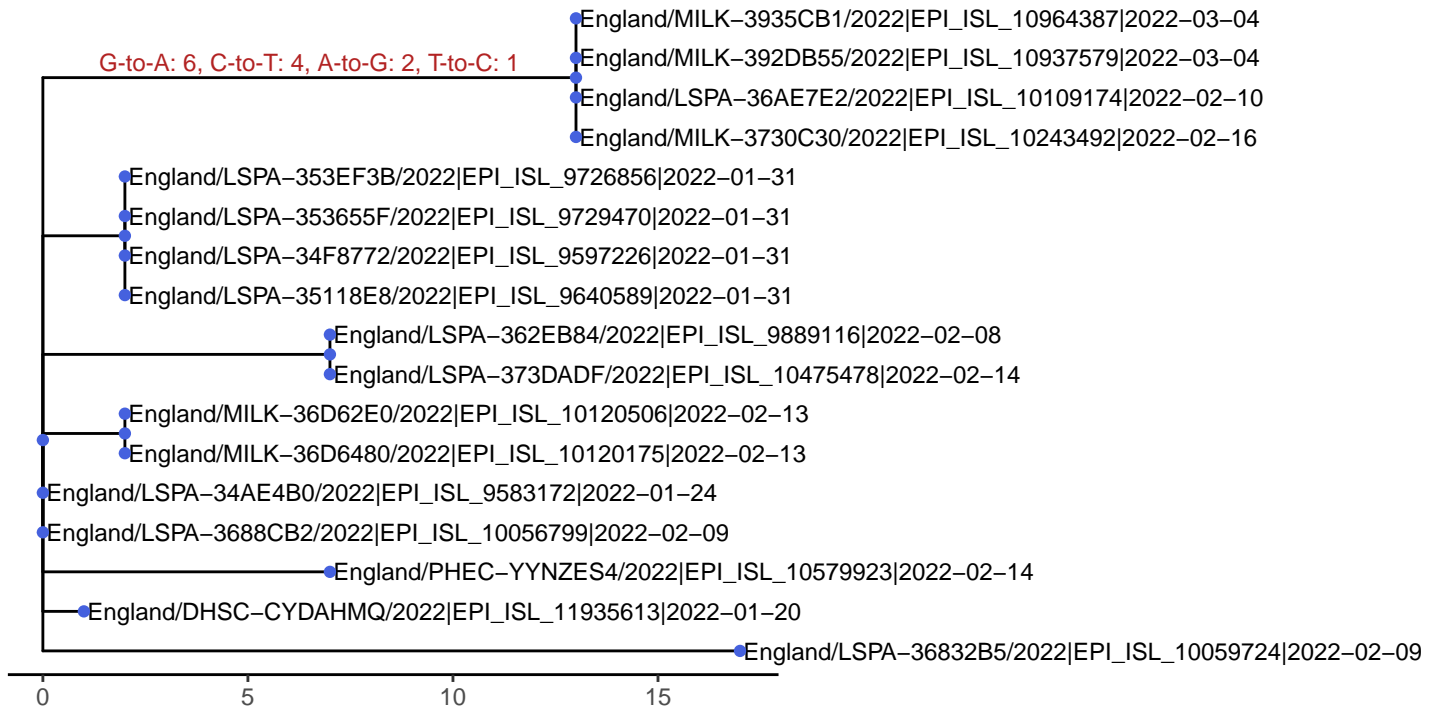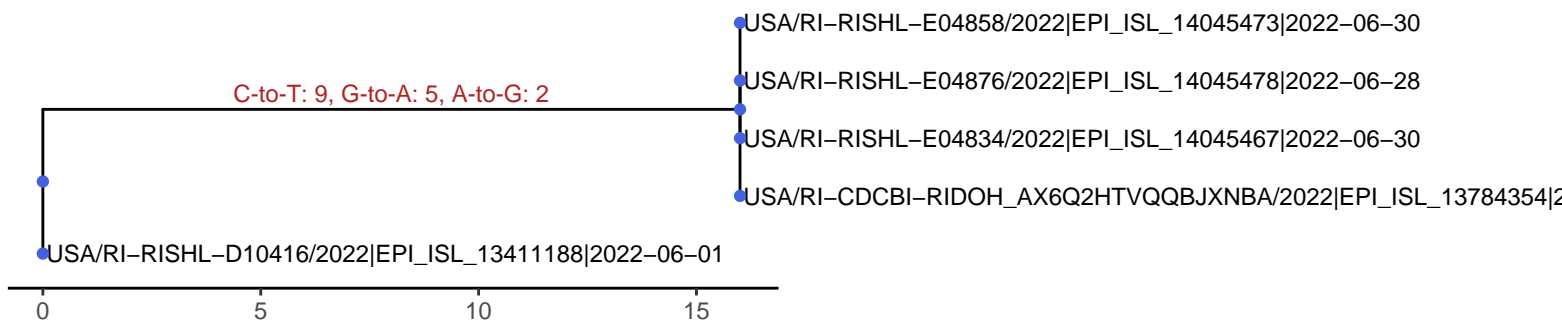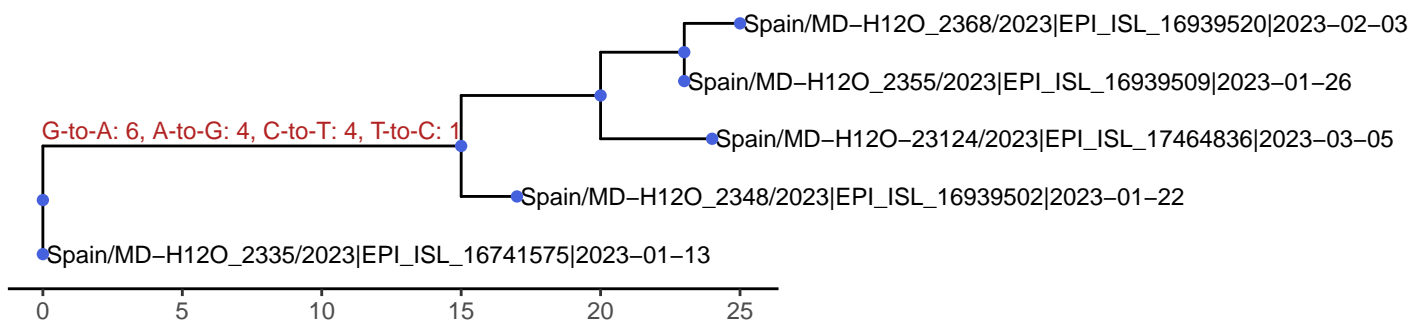



Japan/PG-443718/2023|EPI\_ISL\_17047243|2023-01-31  
Japan/PG-443716/2023|EPI\_ISL\_17047241|2023-01-26  
Japan/TKYkbm88369/2023|EPI\_ISL\_17213399|2023-02-20  
Japan/PG-446071/2023|EPI\_ISL\_17047305|2023-02-01  
Japan/TKYmbc36281/2023|EPI\_ISL\_17172535|2023-02-08  
Japan/PG-442527/2023|EPI\_ISL\_16972384|2023-01-16  
Japan/TKYkbm83657/2023|EPI\_ISL\_16828517|2023-01-12

C-to-T: 13, G-to-A: 13, A-to-G: 3, T-to-C: 1

Japan/PG-439690/2023|EPI\_ISL\_16994643|2023-01-17  
Japan/PG-439688/2023|EPI\_ISL\_16994641|2023-01-17  
Japan/PG-439689/2023|EPI\_ISL\_16994642|2023-01-17  
Japan/PG-449494/2023|EPI\_ISL\_16994655|2023-01-18

Japan/PG-455075/2023|EPI\_ISL\_17103193|2023-02-13  
Japan/PG-452089/2023|EPI\_ISL\_17027683|2023-02-08  
Japan/TKYnat12115/2023|EPI\_ISL\_17186867|2023-01-31  
Japan/TKYkbm87664/2023|EPI\_ISL\_17015023|2023-02-03  
Japan/TKYmbc35071/2023|EPI\_ISL\_16950755|2023-01-20  
Japan/TKYmbc35072/2023|EPI\_ISL\_16950756|2023-01-20  
Japan/TKYkbm88000/2023|EPI\_ISL\_17068796|2023-02-09  
Japan/TKYhug15859/2023|EPI\_ISL\_17030510|2023-01-13  
Japan/TKYhug15193/2022|EPI\_ISL\_17015640|2022-12-23  
Japan/TKYkbm81768/2023|EPI\_ISL\_16718912|2023-01-05  
Japan/TKYkbm75884/2022|EPI\_ISL\_16678582|2022-12-20  
Japan/PG-412773/2022|EPI\_ISL\_16279633|2022-12-09  
Japan/PG-470228/2023|EPI\_ISL\_17560700|2023-04-09  
Japan/TKYkbm88360/2023|EPI\_ISL\_17213391|2023-02-20  
Japan/TKYmbc36153/2023|EPI\_ISL\_17087325|2023-02-06  
Japan/PG-452103/2023|EPI\_ISL\_17027696|2023-02-09  
Japan/PG-444043/2023|EPI\_ISL\_17153048|2023-01-27  
Japan/PG-452017/2023|EPI\_ISL\_17027616|2023-02-06  
Japan/PG-447871/2023|EPI\_ISL\_17014133|2023-01-31  
Japan/PG-442084/2023|EPI\_ISL\_16947644|2023-01-23  
Japan/PG-427970/2022|EPI\_ISL\_16559480|2022-12-23  
Japan/PG-427857/2022|EPI\_ISL\_16559374|2022-12-21  
Japan/PG-423380/2022|EPI\_ISL\_16644517|2022-12-20  
Japan/PG-432033/2023|EPI\_ISL\_16637569|2023-01-03  
Japan/TKYkbm75762/2022|EPI\_ISL\_16678655|2022-12-20  
Japan/PG-434482/2023|EPI\_ISL\_16691284|2023-01-06  
Japan/TKYkbm75970/2022|EPI\_ISL\_16678482|2022-12-20  
Japan/TKYkbm75707/2022|EPI\_ISL\_16678604|2022-12-20  
Japan/TKYmbc28251/2022|EPI\_ISL\_16691743|2022-12-13  
Japan/TKYmbc29134/2022|EPI\_ISL\_16695179|2022-12-23  
Japan/TKYkbm79716/2022|EPI\_ISL\_16718033|2022-12-26  
Japan/TKYkbm79857/2022|EPI\_ISL\_16718159|2022-12-27  
Japan/PG-434269/2022|EPI\_ISL\_16716445|2022-12-27  
Japan/PG-434262/2022|EPI\_ISL\_16716438|2022-12-27  
Japan/TKYmbc32223/2023|EPI\_ISL\_16808344|2023-01-05  
Japan/PG-441229/2023|EPI\_ISL\_16825514|2023-01-16  
Japan/TKYkbm82614/2023|EPI\_ISL\_16828124|2023-01-06  
Japan/TKYkbm86019/2023|EPI\_ISL\_16939338|2023-01-24  
Japan/TKYkbm86820/2023|EPI\_ISL\_17014096|2023-01-24  
Japan/TKYmbc35958/2023|EPI\_ISL\_17087165|2023-02-01  
Japan/TKYnat12092/2023|EPI\_ISL\_17186844|2023-01-31  
Japan/HI6845A2285/2022|EPI\_ISL\_17382499|2022-12-23  
Japan/PG-414596/2022|EPI\_ISL\_16279193|2022-12-08  
Japan/TKYmbc35935/2023|EPI\_ISL\_17087144|2023-02-01  
Japan/TKYmbc36014/2023|EPI\_ISL\_17087212|2023-02-02  
Japan/TKYkbm87886/2023|EPI\_ISL\_17087444|2023-02-06  
Japan/TKYkbm87970/2023|EPI\_ISL\_17068921|2023-02-07  
Japan/TKYmbc35351/2023|EPI\_ISL\_17029204|2023-01-24  
Japan/PG-452133/2023|EPI\_ISL\_17027724|2023-02-11  
Japan/TKYhug15280/2022|EPI\_ISL\_17015723|2022-12-26  
Japan/PG-440793/2023|EPI\_ISL\_17014290|2023-01-21  
Japan/PG-439942/2023|EPI\_ISL\_17014251|2023-01-16  
Japan/PG-442962/2023|EPI\_ISL\_17014409|2023-01-23  
Japan/PG-448405/2023|EPI\_ISL\_16972980|2023-02-06  
Japan/TKYhug15060/2022|EPI\_ISL\_16952381|2022-12-21  
Japan/TKYmbc33805/2023|EPI\_ISL\_16880552|2023-01-12  
Japan/TKYmbc31278/2022|EPI\_ISL\_16843672|2022-12-30  
Japan/TKYmbc33135/2023|EPI\_ISL\_16809546|2023-01-10  
Japan/TKYmbc32903/2023|EPI\_ISL\_16809210|2023-01-07  
Japan/TKYmbc32318/2023|EPI\_ISL\_16808422|2023-01-06  
Japan/TKYkbm79950/2022|EPI\_ISL\_16718236|2022-12-29  
Japan/TKYkbm79796/2022|EPI\_ISL\_16718106|2022-12-27  
Japan/TKYmbc29117/2022|EPI\_ISL\_16695167|2022-12-23  
Japan/PG-431663/2023|EPI\_ISL\_16637208|2023-01-02  
SouthKorea/KDCA195101/2022|EPI\_ISL\_16578463|2022-12-28  
Japan/PG-427526/2022|EPI\_ISL\_16545129|2022-12-31  
Japan/TKYkbm69067/2022|EPI\_ISL\_16432315|2022-12-06

0 10 20 30

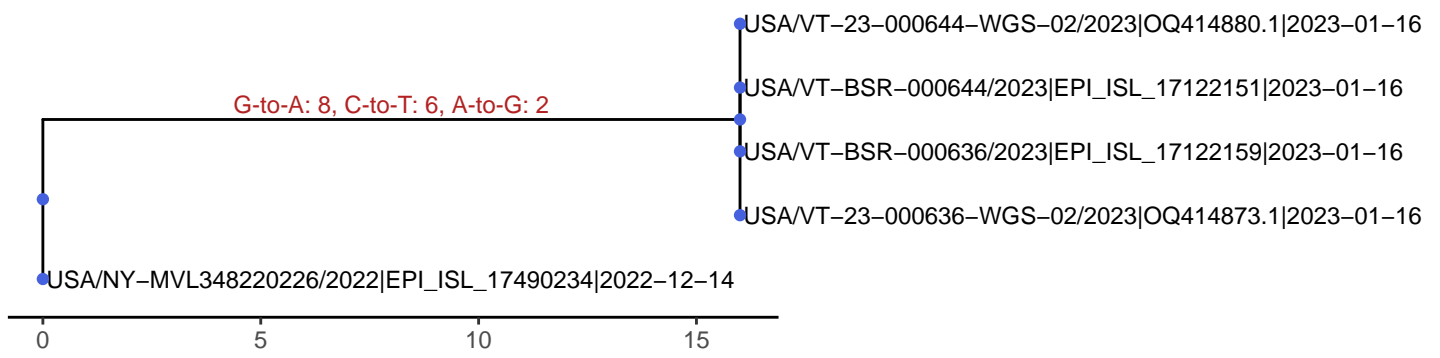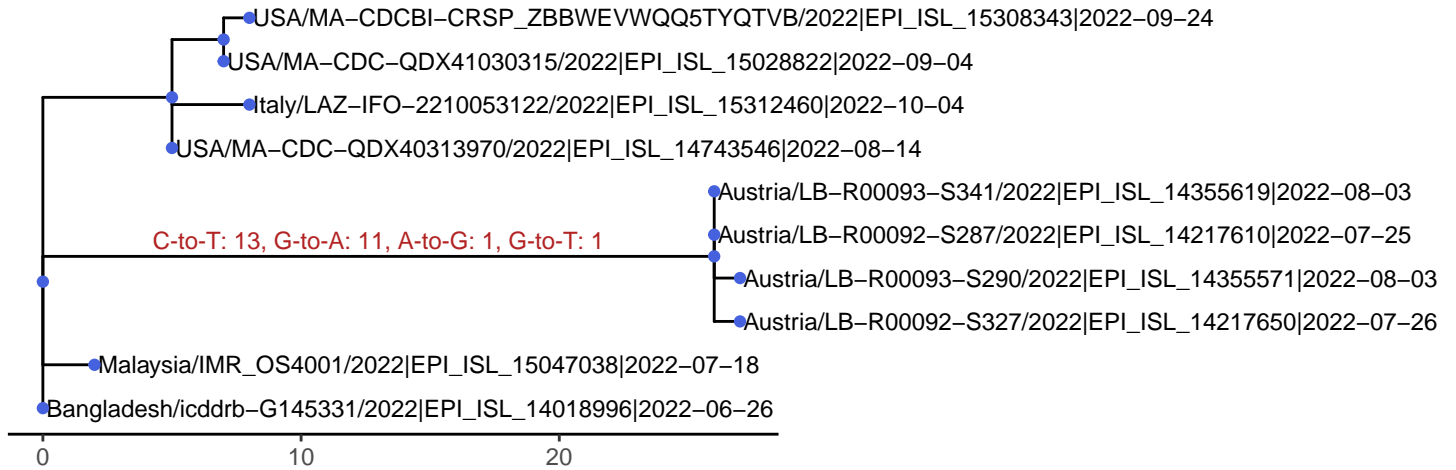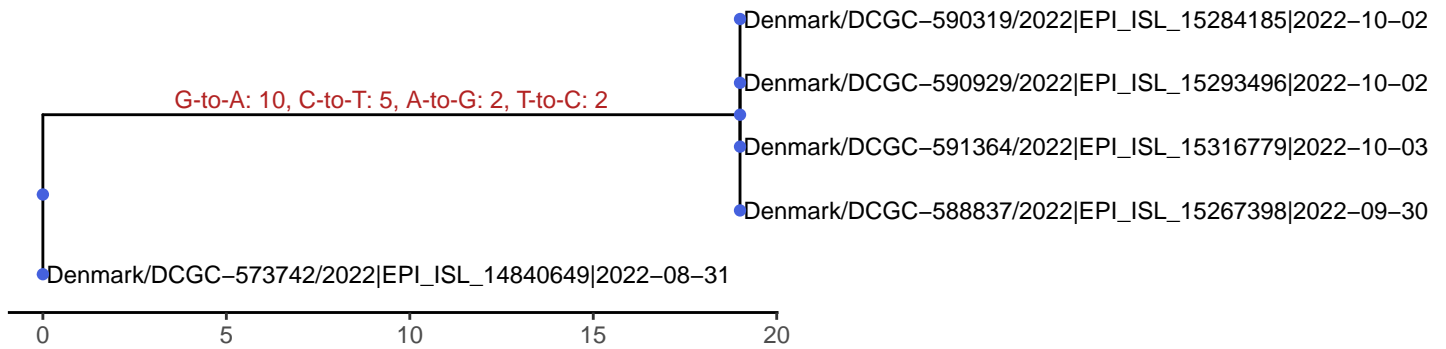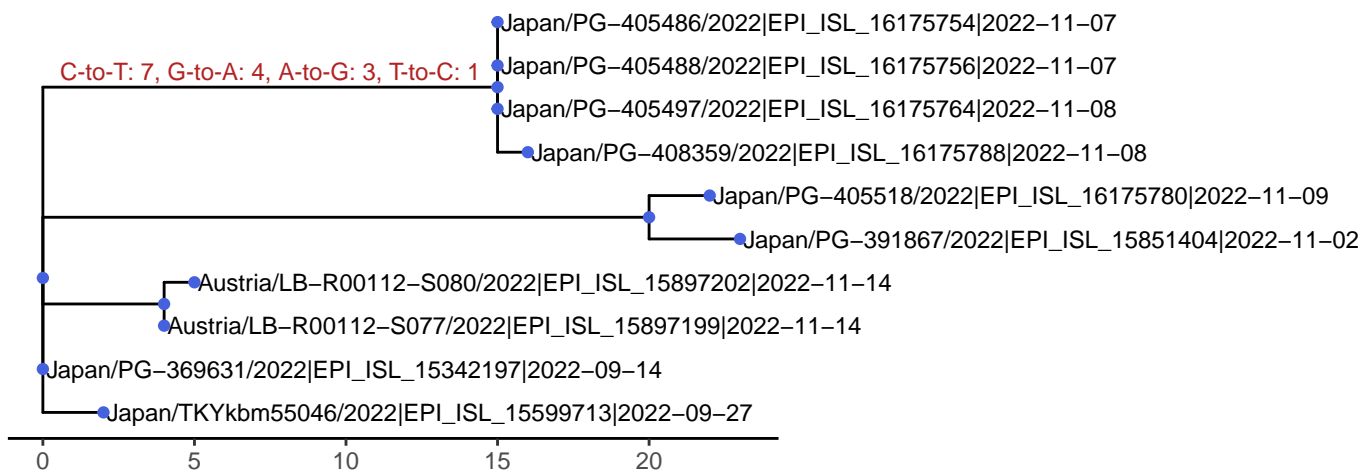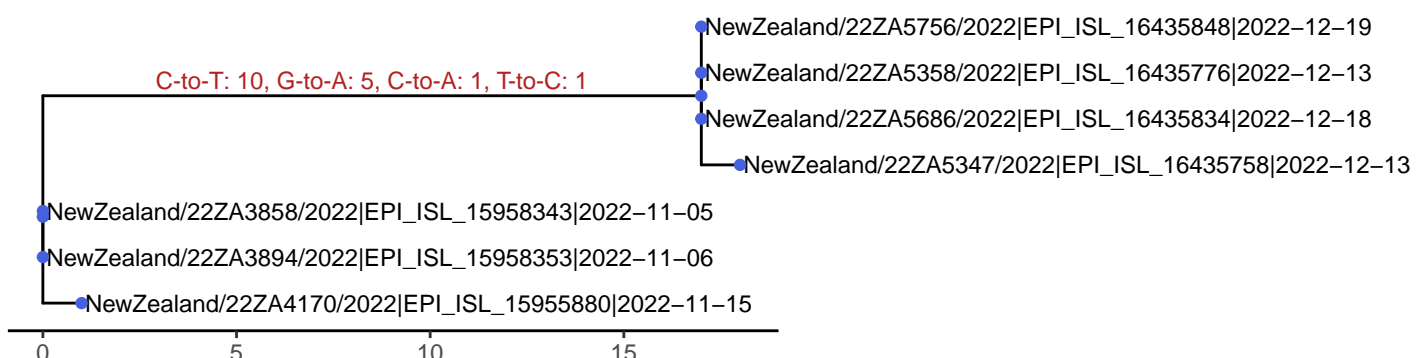

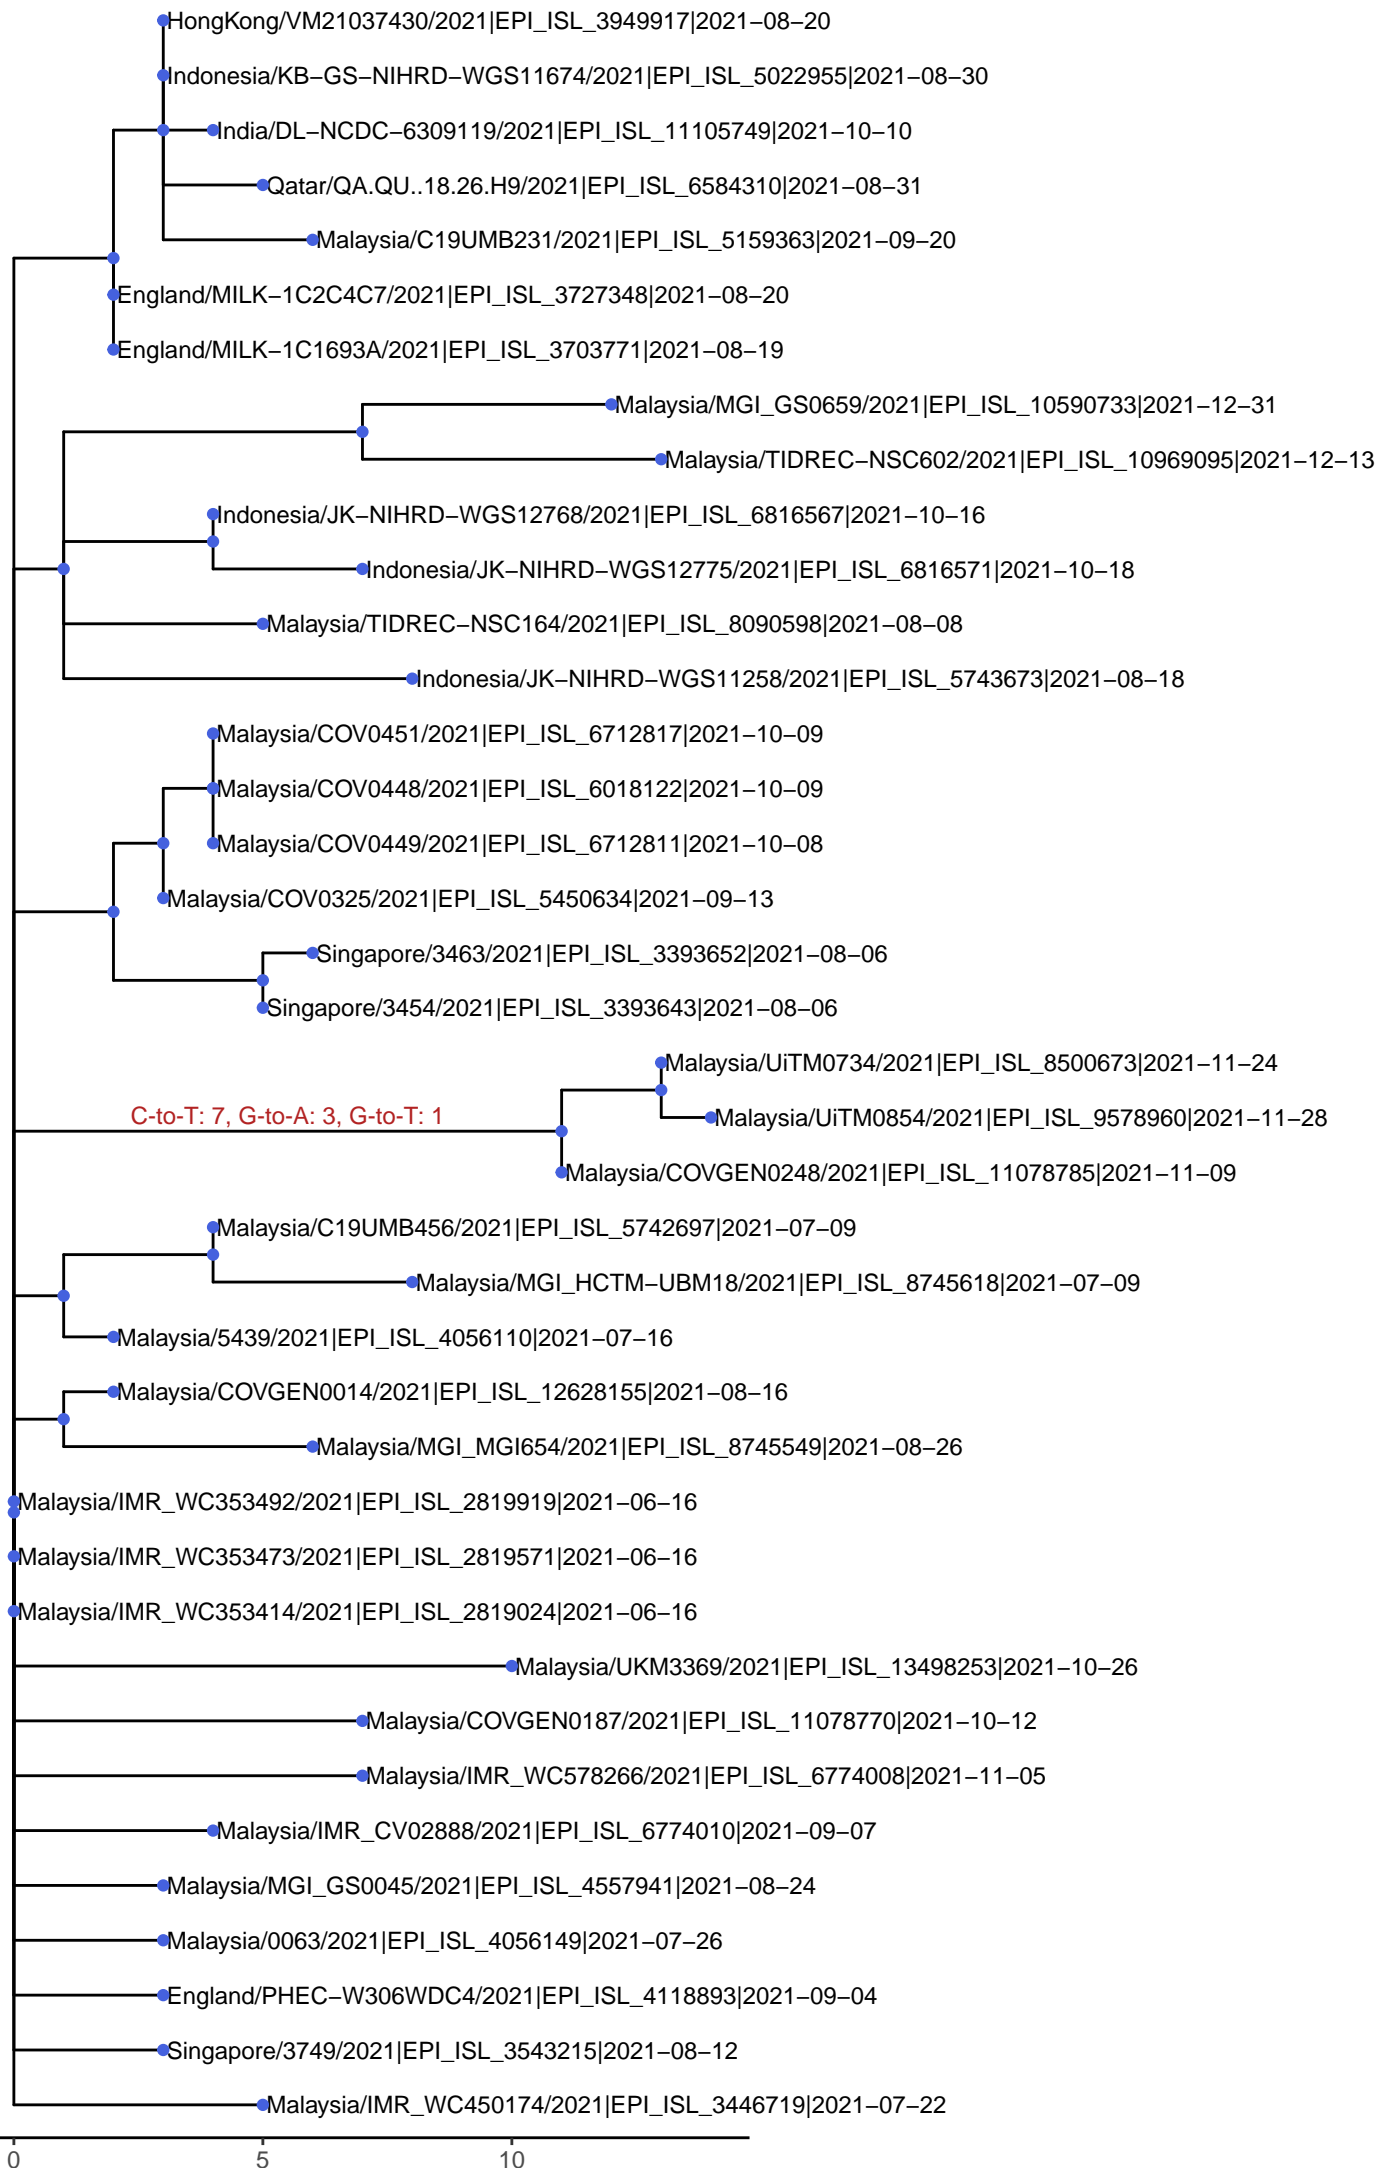



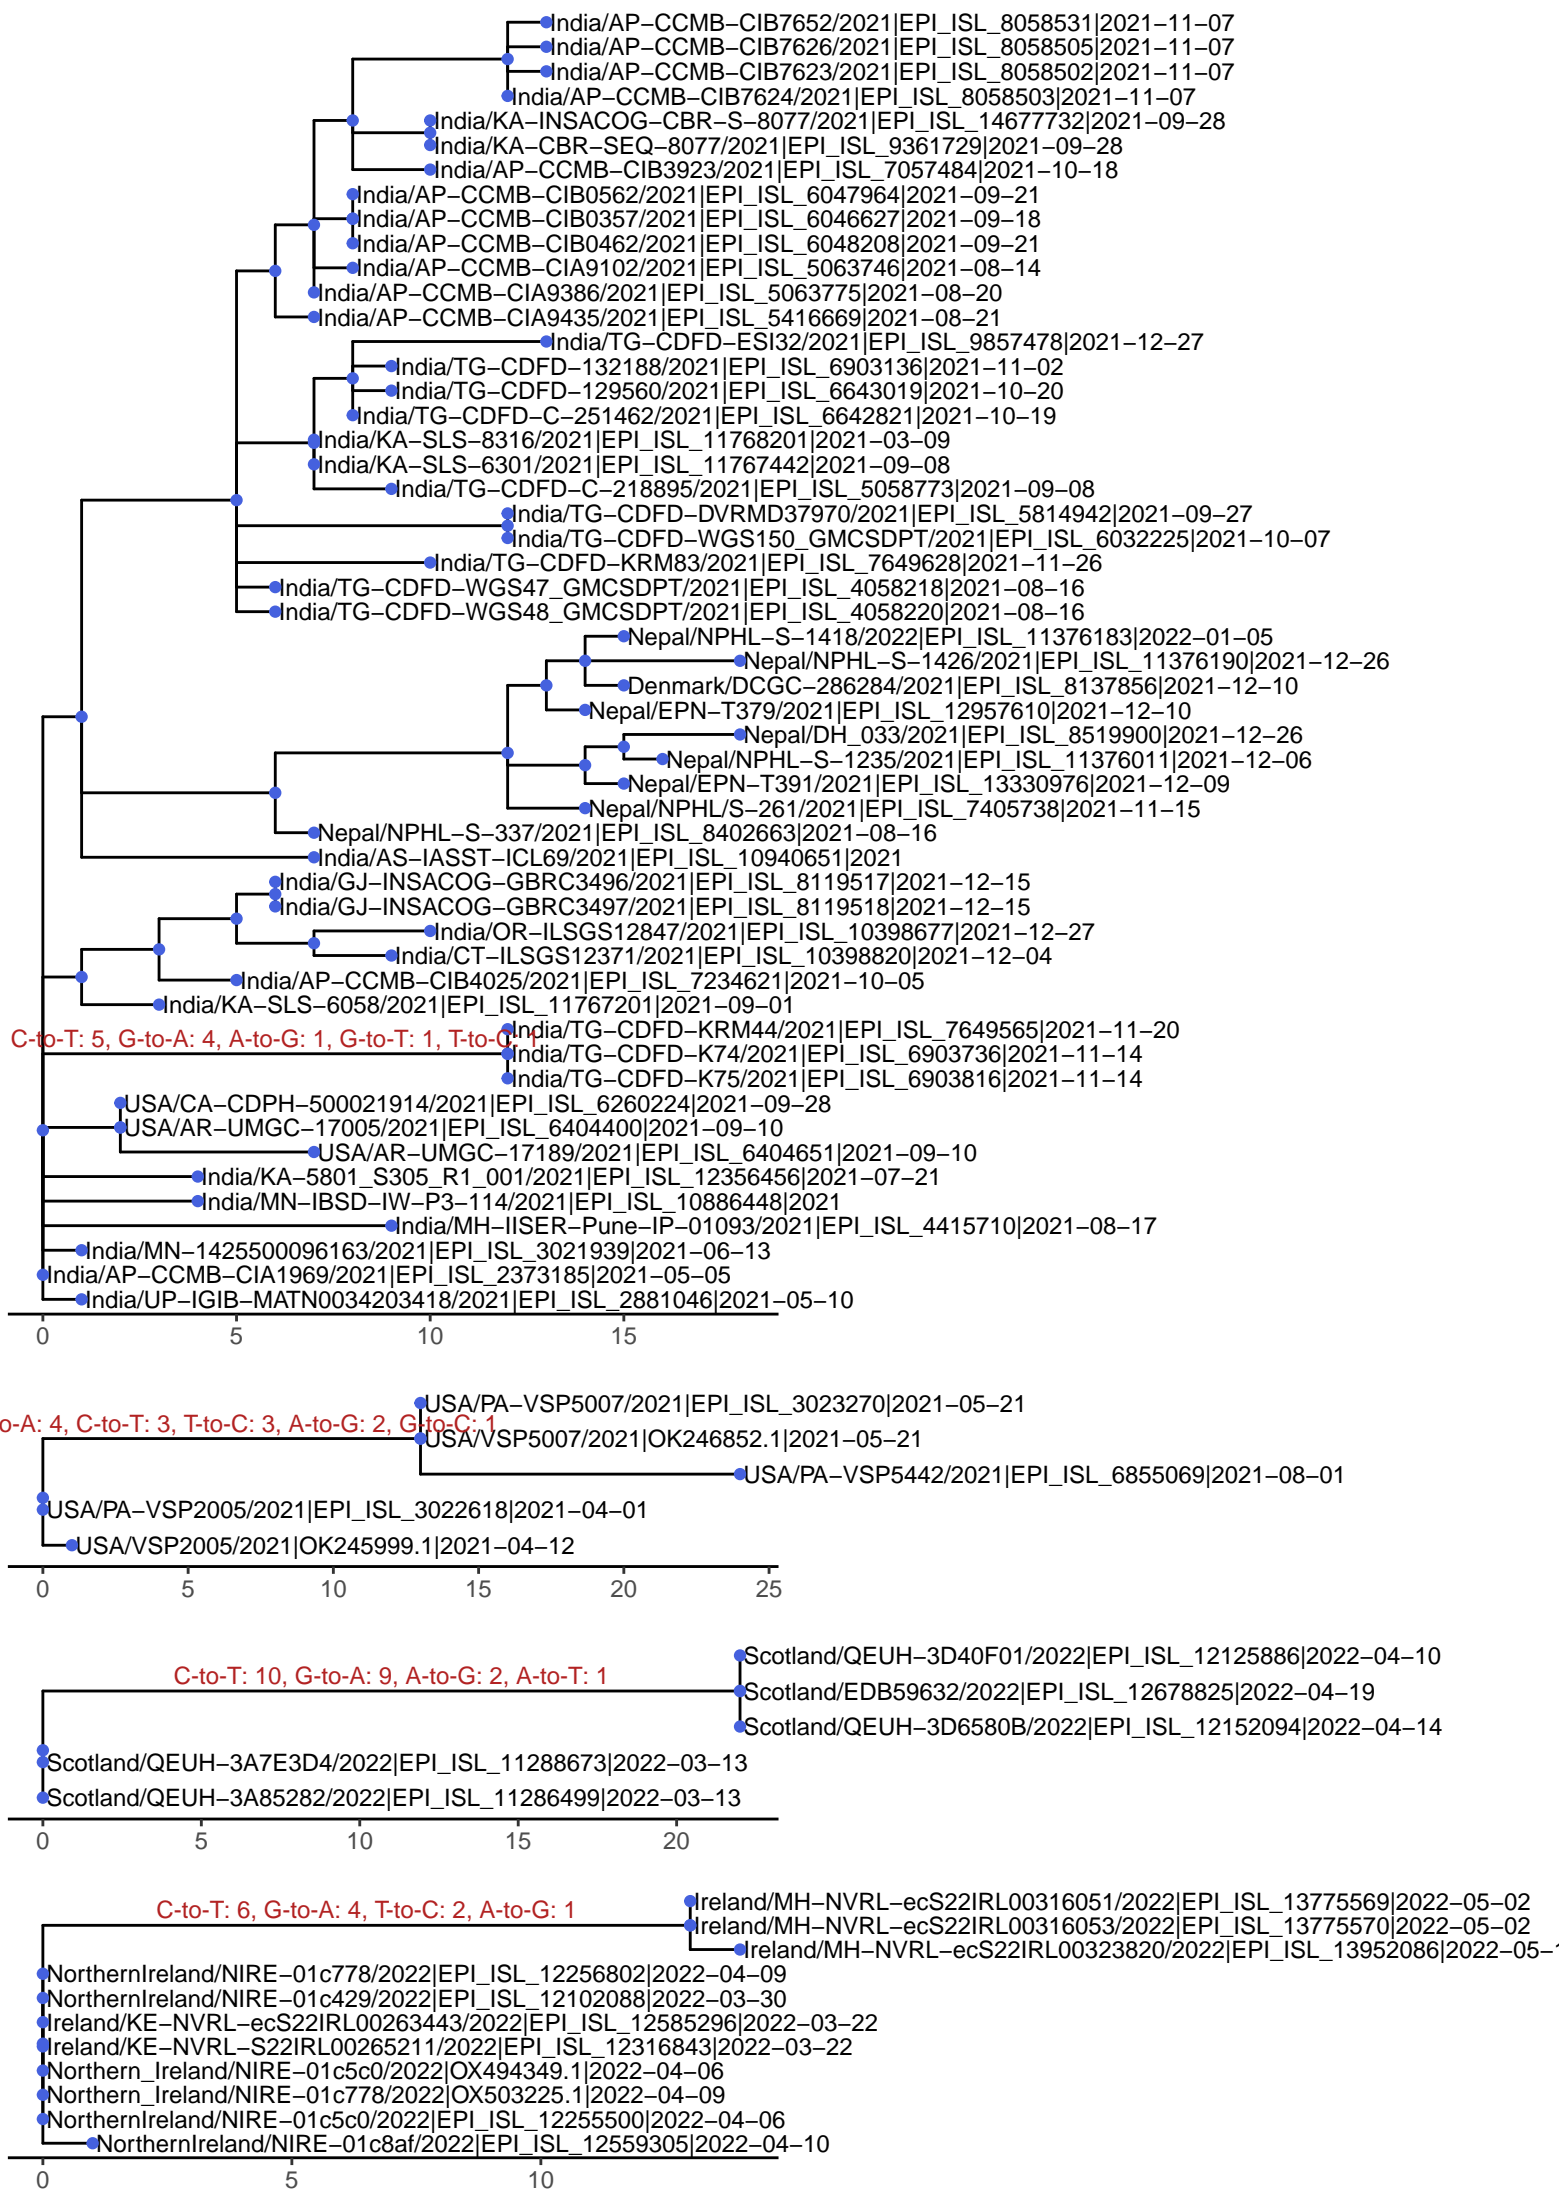

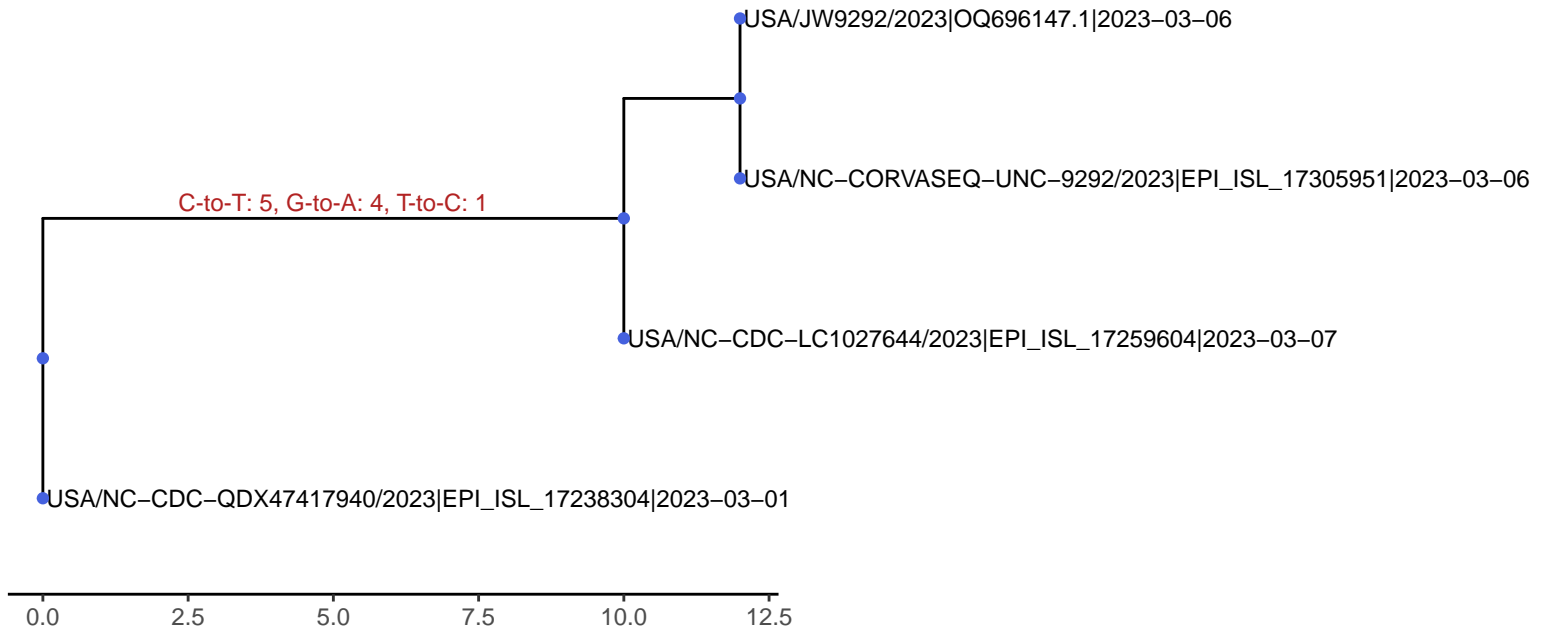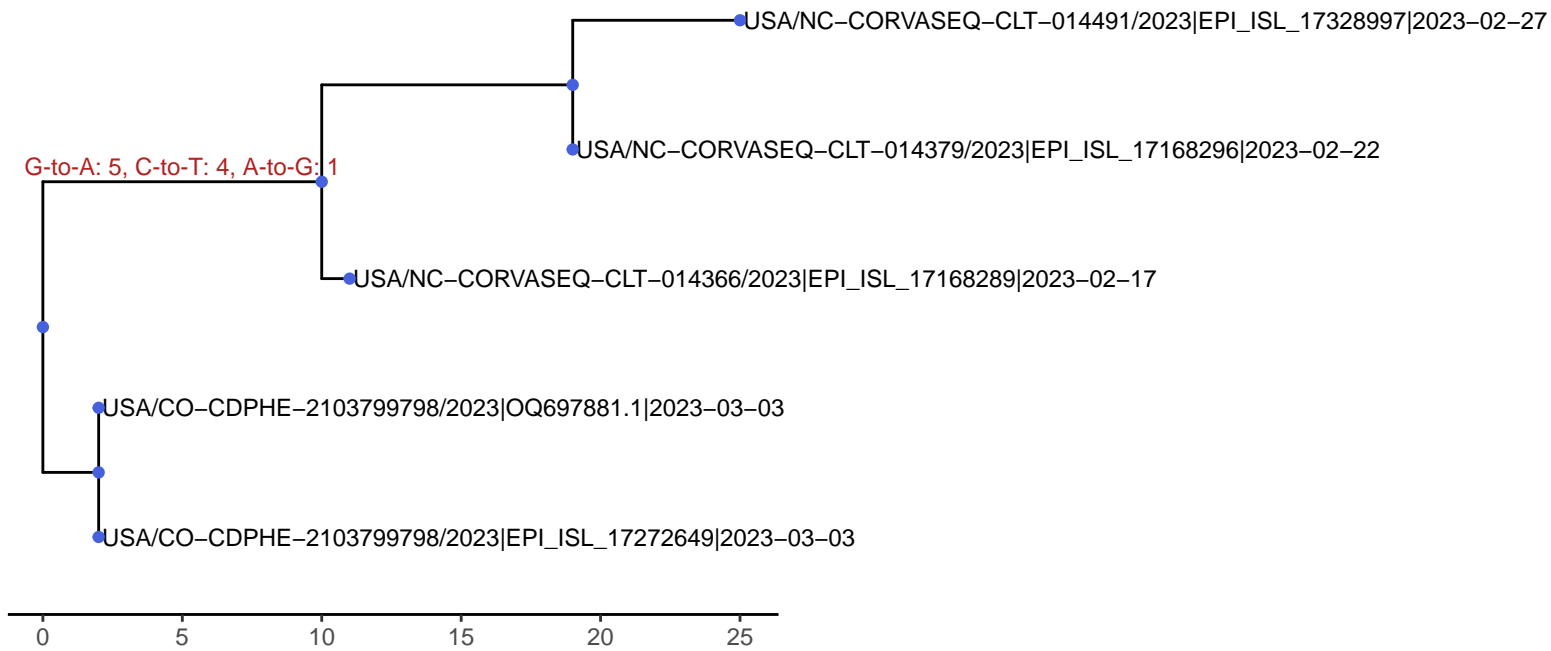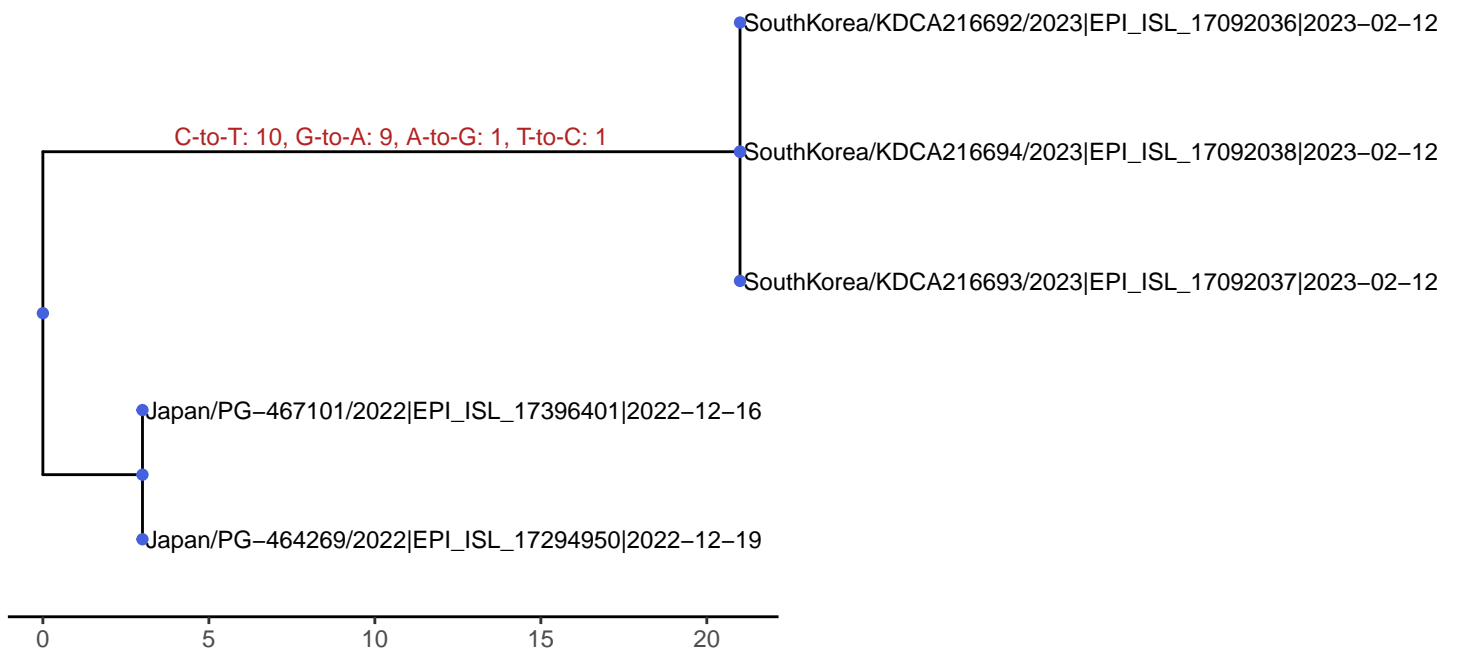

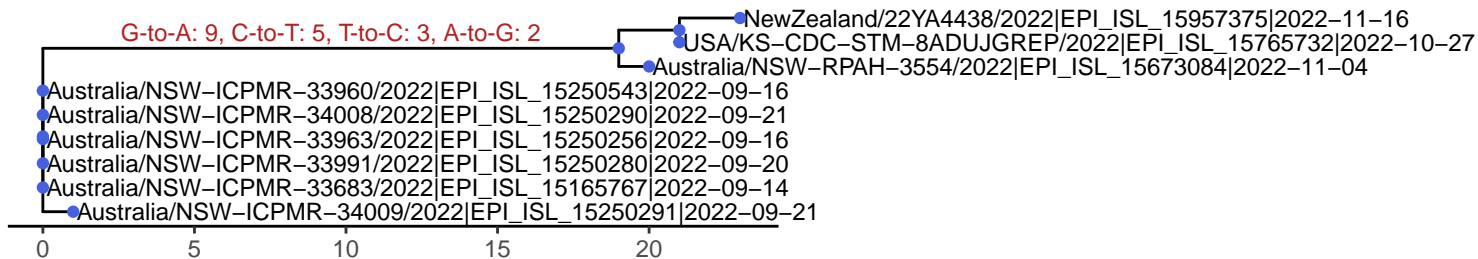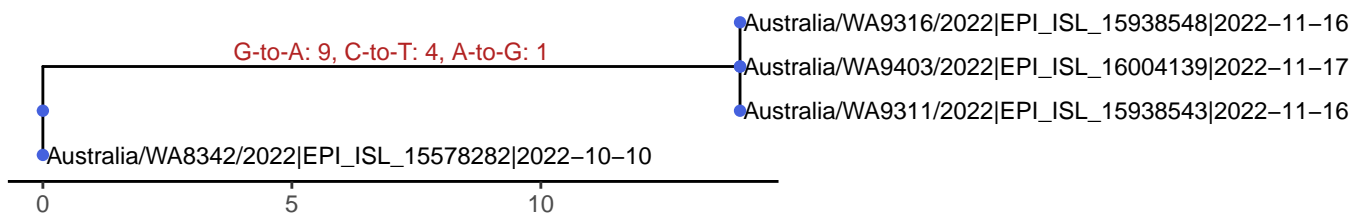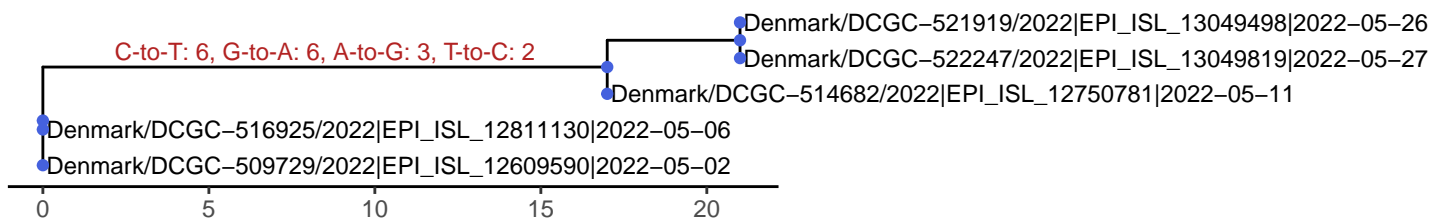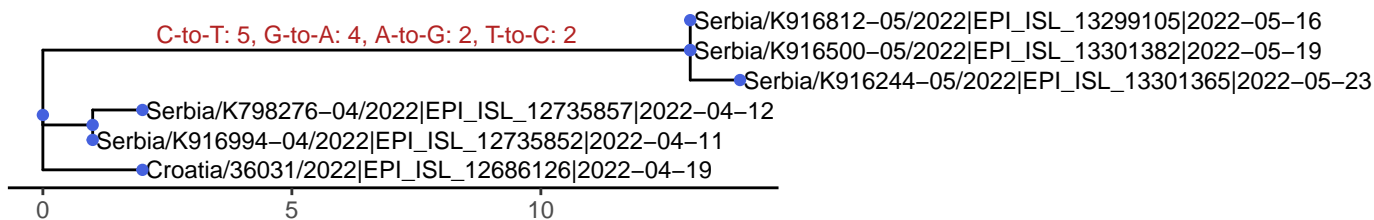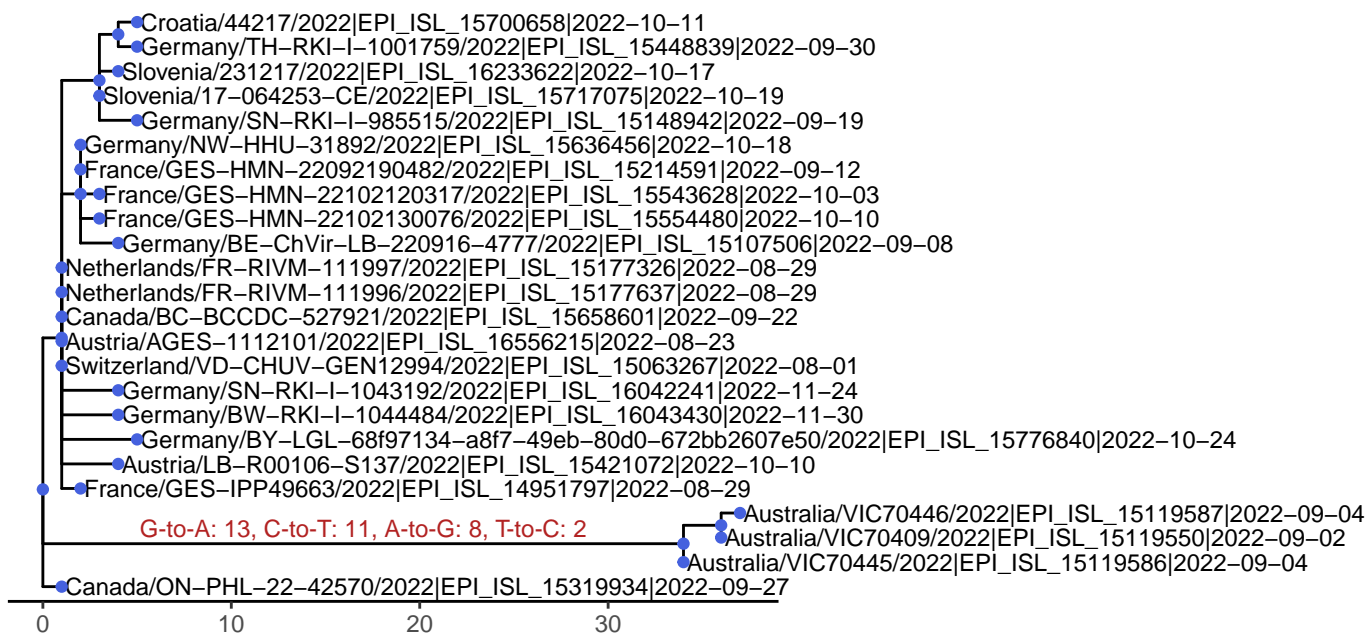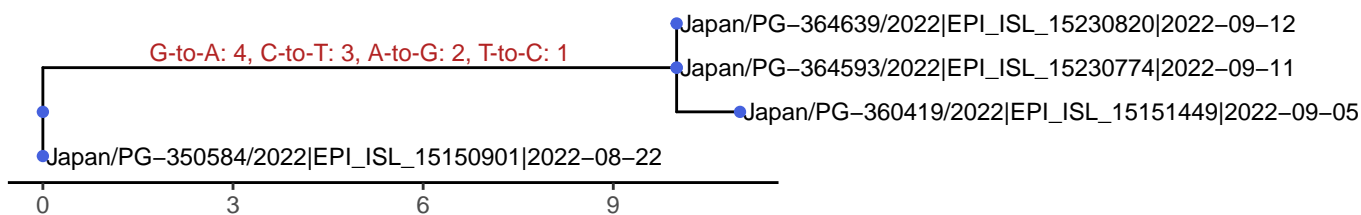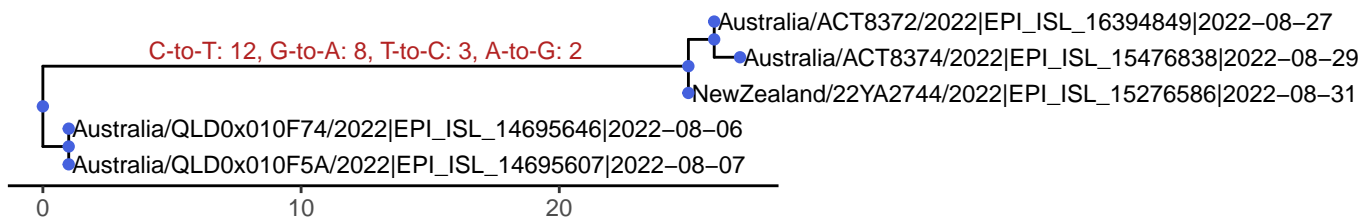

Supplement: Supplementary file [file media-4.pdf]
